# Supplementary material for: Ingression-type cell migration drives vegetal endoderm internalisation in the Xenopus gastrula
Source: eLife journal article supplement (doi:10.7554/elife.27190), 2017-08-10
Supplement: supp [file elife-27190-supp-v1.zip]

Archive with 25 entries (25 files):
- elife_poa_e27190_Figure_9_figure_supplement_1.pdf
- elife_poa_e27190_Video_3.avi
- elife_poa_e27190_Figure_9_figure_supplement_2.pdf
- elife_poa_e27190_Figure_2_figure_supplement_1.pdf
- elife_poa_e27190_Figure_2_source_data_1.xlsx
- elife_poa_e27190_Figure_8_source_data_1.xlsx
- elife_poa_e27190_Figure_7_source_data_1.xlsx
- elife_poa_e27190_Video_7.avi
- elife_poa_e27190_Video_5.avi
- elife_poa_e27190_Figure_4_source_data_1.xlsx
- elife_poa_e27190_Figure_4_figure_supplement_1.pdf
- elife_poa_e27190_Figure_6_figure_supplement_1.pdf
- elife_poa_e27190_Figure_5_source_data_1.xlsx
- elife_poa_e27190_Figure_8_figure_supplement_1.pdf
- elife_poa_e27190_Video_6.avi
- elife_poa_e27190_Figure_4_figure_supplement_1_source_data_1.xlsx
- elife_poa_e27190_Video_1.avi
- elife_poa_e27190_Figure_2_figure_supplement_1_source_data_1.xlsx
- elife_poa_e27190_Figure_7_figure_supplement_1.pdf
- elife_poa_e27190_Figure_9_source_data_1.xlsx
- elife_poa_e27190_Video_2.avi
- elife_poa_e27190_Video_4.avi
- elife_poa_e27190_Transparent_Reporting_File.pdf
- elife_poa_e27190_Video_8.avi
- elife_poa_e27190_Figure_6_source_data_1.xlsx
