# Supplementary material for: Ingression-type cell migration drives vegetal endoderm internalisation in the Xenopus gastrula
Source: eLife journal article supplement (doi:10.7554/elife.27190), 2017-08-10
Supplement: supp [file elife-27190-supp-v1.zip › elife_poa_e27190_Figure_2_figure_supplement_1_source_data_1.xlsx]

## Sheet: Figure 2 - Supplemental 1
Figure 2 S1A
Cell Congruity (explants)				Cell Congruity (embryos)
30min	60min	90min		S10	S10.5	S11
1.39684	1.04559	1.97542		1.39684	4.31429	1.94595
1.15859	1.21883	1.78177		1.15859	2.3	1.64103
1.60338	1.10219	1.11038		1.60338	2	2.5
1.8052	1.82231	1.38451		1.8052	2.25641	2.11111
1.28469	1.01277	1.59653		1.28469	1.65854	2.32258
1.09056	2.23406	1.65161		1.09056	1.34783	1.9375
1.60372	1.36439	1.42537		1.60372	1.48571	2.625
1.19591	1.06168	1.73354		1.19591	3.34615	2.32353
1.19149	1.45862	1.62752		1.19149	3.24242	1.48718
1.18157	0.971297	1.32776		1.18157	3.21875	1.73333
1.21612	2.46417	1.15668		1.21612	2.09524	1.51429
1.31389	2.57487	1.19082		1.31389	3.30556	2
1.43546	1.66636	1.50183		1.43546	2.73684	1.3
1.54021	1.6455	1.18295		1.54021	2.87179	2.17857
1.20632	1.37758	1.24921		1.20632	1.8913	1.56757
1.51422	1.26476	1.38288		1.51422	1.42857	1.75
1.07778	1.43361	1.75739		1.07778	4.3125	2.11111
1.26807	1.42181	1.25808		1.26807	2.66667	0.284211
1.1455	1.7875	1.33884		1.1455	2.10345	2.5
0.946104	2.28129	2.11382		0.946104	1.5641	2.16667
0.948098	1.02998	1.51878		0.948098	2.125	3.38095
1.75239	1.42932	1.49211		1.75239	1.46154	3.7619
1.18902	1.8409	0.994469		1.18902	1.41667	1.52632
1.31431	1.43916	1.2847		1.31431	1.25641	2.63333
1.19072	1.22081	1.80638		1.19072	0.811321	0.932203
1.48993	1.97351	1.60582		1.48993	1.5625	0.982456
1.37023	1.45015	2.38952		1.37023	1.02273	1.03922
1.135	1.42621	1.79053		1.135	1.23077	0.530303
1.54031	1.82847	1.89459		1.54031	2.82353	0.836735
1.22989	1.65232	2.06343		1.22989	2.26471	0.736842
1.47956	1.67973	1.50533		1.47956	2.14286	0.941176
1.06684	1.19166	1.57809		1.06684	2.27083	1.75
1.05709	1.86684	1.15985		1.05709	4.14815	0.650794
1.14708	1.09576	2.21678		1.14708	1.78947	0.608696
1.06189	1.79575	1.23094		1.06189	1.39535	0.606061
0.983672	1.55664	1.91586		0.983672	1.41935	0.608696
1.3591	1.27179	1.31054		1.3591	1.5	0.701754
1.03728	1.84308	1.2358		1.03728	1.04839	1.35
1.20407	1.62907	1.17363		1.20407	1.05357	0.574074
1.34683	2.32642	1.88954		1.34683	1.15094	0.745455
1.42416	1.79831	1.81399		1.42416	0.979592	0.566667
1.31958	1.4113	1.53316		1.31958	1.45455	0.716981
1.30489	1.64494	1.48906		1.30489	0.727273	0.596491
1.33511	1.84771	1.68478		1.33511	0.746269	0.424658
1.29894	1.62785	1.58187		1.29894	1.17647	0.564516
1.26362	1.84588	1.5947		1.26362	1.07143	0.539683
0.982846	1.57601	1.59787		0.982846	0.918033	0.257143
1.29072	1.52609	1.23324		1.29072	0.894737	0.703704
1.01835	1.30528	1.85966		1.01835	0.459459	0.492537
1.37315	1.56529	1.48877		1.37315	0.654545	0.342105
1.6054	1.10707	1.34579		1.6054	0.931034	0.407895
1.18785	1.15499	1.40951		1.18785	0.833333	0.55
1.28259	1.51046	1.38092		1.28259	1.28947	1.10256
1.18309	2.05027	1.67532		1.18309	0.5	1.02381
1.12507	2.61216	1.32827		1.12507	0.954545	0.578947
1.6046	1.45922	1.25571		1.6046	0.508197	0.558824
0.895375	2.03391	1.21543		0.895375	1.08772	0.514286
1.42265	1.43082	1.81174		1.42265	1.06383	1.04167
1.36022	1.03356	1.80965		1.36022	1.20755	0.84
1.45823	1.29782	1.81161		1.45823	0.811594	0.642857
1.38901	1.60977	1.3882		1.38901	1.03636	0.5
1.00683	1.26444	1.33074		1.00683	0.452055	0.606061
1.05828	1.46213	2.12035		1.05828	1.42857	0.486111
1.5277	1.38878	1.66267		1.5277	1.10169	0.645161
1.2831	1.7298	1.68069		1.2831	1.33333	0.763889
0.989294	1.67558	1.90835		0.989294	1.43137	1.42857
0.855731	1.40206	1.31873		0.855731	0.696203	1.82609
2.2344	1.83156	1.59885			0.793651	2.35556
2.27685	1.85742	1.26383			1.08333	1.75
2.15641	1.60258	1.29066			0.577778	1.56
1.79408	1.8459	1.89914			0.911765	2.58537
2.1903	2.01535	1.31137			0.55814	2.5
1.7387	1.4351	1.36388			1.36207	2.125
2.23682	1.94512	2.48498			1.17241	1.01818
1.08927	1.50169	1.80214			1.72973	1.17241
1.58278	1.65017	1.61837			1.55814	1.65714
1.51652	1.54625	2.27405			1.63462	1.51163
1.913	1.33606	1.38483			1.97872	1.775
1.11215	1.32264	1.10017			1.23913	1.78049
1.64838	1.5558	1.90951			2.10526	1.21277
1.46526	1.6266	1.71257			1.93333	1.65854
1.22852	1.545	1.50199			1.68421	1.1087
1.58899	1.68155	1.60466			1.39623	1.5
1.46491	1.83662	1.61343			2.39394	1.07843
1.59099	1.50093	1.73172			1.38	1.12281
1.7023	1.47467	1.74194			1.15517	1.65714
2.17831	1.43679	1.459			1.59574	1.02381
1.50705	1.40559	1.96649			1.53191	1.01961
1.65606	1.79352	1.56389			1.65625	1.43636
1.55266	1.45953	1.61418			1.57143	3
1.7602	1.41662	0.98582			1.27083	1.7234
1.24741	1.45427	1.37087			1.11364	2.67647
1.62409	1.2907	1.74471			0.886364	1.45455
2.46736	1.29261	1.7017			2.02439	1.11364
1.23068	1.72435	1.25812			1.52174	1.06818
1.99788	1.41134	1.44345			1.35484	1.01754
1.61812	1.65735	1.55099			1.94444	0.492754
2.01864		1.41892			2.58333	0.902439
		1.81252			2.06452	0.460317
					1.69048	0.454545
					0.479592	0.438356
					0.452381	0.510417
					0.702703	0.45098
					0.487179	0.659574
					0.413043	0.607143
					0.746032	0.808511
					0.701754	0.486842
					0.928571	1.01786
					0.813559	0.71875
					1.39583	0.907692
					1.475	0.533333
					1.83333	1.03448
					1.86667	0.839286
					2.05263	0.788462
					2.39286	0.358209
					2.73529	0.57971
					0.762712	0.509434
					1.0625	1.06383
					1.94737	0.810811
					1.10169	0.818182
					1.55102	0.93617
						1.9127
						2.68919
						2.25
						1.39241
						2.58772
						2.29885
						3.5
						4.82558
						2.30303
						1.82243
						1.34177
						1.9717
						1.45283
						1.29851
						3.10526
						1.82237
						2.13846
						1.86331
						1.75658
						2.75758
						2.82313
						1.86154
						2.74545
						1.66667
						1.64885
						1.92424
						1.22772
						1.48101
						1.40884
						1.27586
						2.40741
						2.04
						2.03448
						2.49412
						1.4386
						1.08228
						1.36464
						1.33533
						1.0875
						1.46341
						2.66981
						2.32323
						1.68182
						1.64394
						2.2268
						0.948052
						2.36
						1.74107
						1.93893
						2.12
						1.43796
						2.85057
						1.84
						2.58621
						1.23741
						0.942149
						1.30973
						1.21212
						2.19512
						1.60169
						2.20721
						1.81416
