# Supplementary material for: Ingression-type cell migration drives vegetal endoderm internalisation in the Xenopus gastrula
Source: eLife journal article supplement (doi:10.7554/elife.27190), 2017-08-10
Supplement: supp [file elife-27190-supp-v1.zip › elife_poa_e27190_Figure_2_source_data_1.xlsx]

## Sheet: Figure 2
Figure 2C						Figure 2D
Cell Number						Angles (°)								Angles (°)
BCF						Explant	30min			60min				Embryo	S10			S10.5
	Time (min)	Embryo 1	Embryo 2	Embryo 3			Top	Mid	Bottom	Top	Mid	Bottom			Top	Mid	Bottom	Top	Mid	Bottom
	30	12	11	12			41.74	39.87	15.09	90	15.64	16.05			51.62	52.21	37.04	85.13	19.58	33.9
	60	17	17	16			32.37	77.74	33.34	90	35.31	24.97			51.4	20.61	40.93	77.07	6.09	41.11
	90	17	17	18			71.37	13.28	56.93	33.93	24.78	12.04			17.53	4.12	17.99	53.71	29.77	38.97
							73.61	36.25	52.31	32.62	20.14	28.81			16.39	41.1	55.07	72.25	8.58	31.85
Equator							44.46	41.37	56.08	71.32	12.09	16.09			34.05	45.91	48.32	75.96	31.1	30.4
	Time (min)	Embryo 1	Embryo 2	Embryo 3			43.45	17.49	5.87	78.26	12.64	33.69			51.47	50.79	4.36	63.02	31.22	66.85
	30	20	22	22			42.09	35.22	17.35	67.71	22.12	10.25			12.8	60.8	33.2	85.31	33.91	4.4
	60	16	17	16			75.96	24.3	8.05	67.81	26.21	22.61			34.26	80.85	49.57	70.48	5.59	9.09
	90	14	15	14			50.1	15.52	14.49	85.92	18.97	52.13			38.54	69.11	11.5	75.37	22.71	3.26
							47.61	38.16	60.63	72.5	19.05	32.47			34.66	69.72	23.34	60.66	46.22	6.84
							42.68	48.37	7.59	31.22	19.29	50.08			41.63	35.8	31.1	62.5	35.61	27.16
							53.57	64.98	68.75	68.07	18.43	61.25			23.97	48.99	57.37	56.58	36.14	30.7
							34.51	13.96	15.52	52.13	12.03	55.25			70.03	48.24	83.46	80.68	30.99	61.39
							77.74	8.4	13.63	59.43	10.51	63.73			64.29	47.33	69.48	41.91	49.86	3.62
							59.62	33.06	34.43	63.43	14.66	21.45			71.75	21.67	66.37	62.46	20.77	61.99
							81.36	55.75	40.5	22.83	19.68	36.09			18.99	16.06	40.64	57.99	35.07	73.96
							51.84	26.98	32.98	62.59	12.45	20.95			31.79	57.34	47.58	51.46	42.98	44.07
							77.99	23.96	12.09	74.29	36.52	19.31			48.28	45.78	10.93	63.06	9.05	42.98
							69.26	25.84	42.61	65.56	36.68	13.21			61	41.86	69.44	48.14	21.8	66.39
							78.31	32.97	8.53	26.57	29.51	22.62			25.07	46.8	75.96	25.36	19.99	48.72
							75.96	12.34	51.95	68.2	5.12	22.48			40.74	10.52	24.54	64.68	19.96	23.81
							68.2	32.57	29.25	75.02	5.97	33.69			64.33	49.46	51.34	40.1	17.1	43.98
							73.07	35.75	15.42	74.88	60.02	20.85			58.28	38.52	59.16	63.11	22.44	29.89
							73.74	63.43	53.62	70.97	20.1	6.01			58.34	26.05	60.34	50.11	24.78	40.16
							67.25	28.61	21.8	62.49	10.24	54.16			84.21	42.5	17.99	58.19	39.27	42.34
							87.27	51.07	9.46	62.93	35.13	66.8			23.67	30.07	51.12	71.8	43.36	45.29
							86.74	43.83	45	8.97	21.25	57.53			51.34	62.68	69.66	67.99	10.3	34.38
							81.12	16.86	17.76	64.05	6.25	35.31			33.84	43.81	35.22	18.8	45	42.51
							82.41	25.2	47.49	75.44	21.25	41.99			82.91	22.58	29.17	37.79	12.75	46.47
							39.4	53.13	34.99	65.38	30.58	21.25			72.9	46.61	47.07	45	17.56	70.79
							62.35	68.63	14.47	49.45	28.61	42.71			30.57	45.47	42.51	83.38	13.76	30.77
							71.57	60.95	54.87	55.67	28.12	76.98			73.5	45.33	10.58	57.09	77.66	59.22
							37.3	53.13	18.23	52.31	26.57	54.77			20.71	40.2	50.07	23.2	17.72	51.55
							23.7	38.85	21.77	74.96	40.6	78.69			69.01	61.58	52.94	17.18	18.34	15.11
							38.37	63.43	30.51	80.54	68.75	59.53			28.54	58.61	60.81	26.86	25.3	42.88
							43.83	68.75	43.92	70.35	37.3	49.76			23.42	63.43	50.28	49.57	23.47	7.02
							72.12	35.46	24.49	79.84	13.11	57.26			30.63	48.3	9.31	36.61	30.22	29.74
							16.89	13.49		33.85	21.8	55.01			51.1	16.7	61.61	74.16	14.11	63.43
							16.39	46.74		69.93	43.45	55.01			20.27	84.85	22.93	58.99	25.77	32.15
							8.35	31.7		66.45	41.42	72.33			58.78	12.94	27.18	22.92	39.43	56.93
							17.7	54.87		62.84	30.26	7.85			21.99	69.84	6.9	21.51	28.51	63.9
							34.25	27.84		30.68	30.26	26.57			45.37	62.78	19.75	34.1	43.07	69.06
							38.96	22.38		68.41	30.65	20.22			29.97	73.43	52.7	16.8	27.6	46.59
							33.39	33.69		47.79	14.83	28.14			32.74	33.68	24.18	9.46	39.26	20.77
							19.83	42.27		45.78	16.39	37.87			22.48	63.29	36.27	20.56	24.18	36.86
							55.49	36.25		83.05	28.61	39.42			41.82	63.43	15.35	39.81	79.04	14.28
							43.03	30.52		74.61	6.71	24.94			47.74	32.37	14.74	22.55	44.33	68.75
							21.04	19.29			26.57	38.09			12.7	40.01		17.97	26.27	76.83
							44.53	36.25			42.51	28.5			38.35	21.99		84.71	40.39	52.53
							62.85	20.32			36.42	34.78			47.06	68.68		27.18	6.77	53.29
							60.95	44.48			57.72	15.42			45	57.53		29.87	18.12	47.42
							23.39	27.63			47.12	21.04			44.05	67.38		74.74	11.5	7.25
							25.94	38.88			53.52	56.75			35.87	29.32		40.82	8.53	63.97
							36.91	48.18			53.13	41.67			16.39	15.38		32.23	38.09	39.54
							70.11	15.35			30.96				40.63	61.33		23.78	31.39	28.61
							4.4	45.4			35.54				49.27	53.34		90	37.64	29.05
								59.85			8.33				68.63	19.44		78.69	38.83	24.17
								46.01			40.6				47.38	19.57		13.26	7.25	9.82
								18.23			37.79				13.3	29.76		56.61	18.43	12.22
								39.04			63.43					30.11		58.17	15.8	18.89
								37.69			50					47.49		19.5	52.21	65.34
								40.82			65.22					39.64		42.75	12.99	67.07
								29.2			17.18					73.66		36.37	39.09	15.1
								38.48			58.11					29.36		19	20.17	71.24
								37.32			27.65					17.02		57.95	29.2	76.31
								48.58			17.33					26.57		41.33	26.03	18.08
											32.75					7.56		3.97	7.47	13.11
											6.84					13.43		30.7	49.14	46.27
											27.9					34.34		61.11	14.66	17.65
											32.74					51.12		31.22	18.06	61.14
											47.23					54.57		67.52	33.15	52.01
											14.04					54.57		57.03	42.88	55.81
											19.28					28.07		51.84	27.55	10.38
											16.7					24.23		9.21	18.43	31.8
											39.09					33.02		65.22	29.25	45.11
											18.15					28.69		59.16	33.09	25.6
											35.75					30.14		21.45	32.97	47.17
											38.58					19.49		45.76	40.31	14.64
											46.1							85.82	82.43	19.87
											35.05							67.43	24.7	26.32
											40.86							54.93	29.86	29.2
																		57.77	7.04
																		46.21	16.7
																		42.71	70.62
																		27.17	23.33
																		38.99	73.15
																		55.75	24.67
																		58.08	31.48
																		83.83	30.85
																		40.03	54.13
																		79.8	19.21
																		62.19	27.1
																		75.07	44.03
																		66.37	67.61
																		74.05	27.8
																		37.23	41.66
																		38	39.57
																		23.7	43.2
																		16.48	77.12
																		60.95	80.85
																		75.68	41.26
																		75.02	37.55
																		82.53	36.87
																		53.65	4.61
																		52.7	65.56
																		61.19	23.16
																		24.81	32.17
																		68.7	24.27
																		55.05	27.48
																		34.56	24.23
																		68.2	29.48
																		19.44	23.57
																		69.08	67.01
																		28.95	52.35
																		4.5	29.5
																		75.72	27.3
																		69.68	27.8
																		38.3
																		56.55
																		47.51
