# Supplementary material for: Ingression-type cell migration drives vegetal endoderm internalisation in the Xenopus gastrula
Source: eLife journal article supplement (doi:10.7554/elife.27190), 2017-08-10
Supplement: supp [file elife-27190-supp-v1.zip › elife_poa_e27190_Figure_4_figure_supplement_1_source_data_1.xlsx]

## Sheet: Figure 4 - Supplemental 1
Figure 4 S1 C
Cell	Alignment (°)	Velocity (µm/min)
1	45.49	0.1
2	54.78	0.21
3	79.16	0.22
4	35.48	0.25
5	34.38	0.28
6	12.68	0.28
7	61.5	0.29
8	40.83	0.31
9	12.07	0.35
10	80.13	0.35
11	59.83	0.35
12	40.24	0.35
13	64.63	0.35
14	35.67	0.35
15	1.97	0.4
16	80.15	0.59
17	10.71	0.63
18	20	0.66
19	13.86	0.79
20	10.81	0.86
21	25.15	0.88
22	9.79	0.93
23	11.75	1
24	21.34	1.04
25	13.79	1.06
26	7.35	1.11
27	10.62	1.23
28	1.52	1.25
29	4.01	1.41
30	32.74	1.56
31	36.87	1.6
32	30.7	1.97
