# Supplementary material for: Ingression-type cell migration drives vegetal endoderm internalisation in the Xenopus gastrula
Source: eLife journal article supplement (doi:10.7554/elife.27190), 2017-08-10
Supplement: supp [file elife-27190-supp-v1.zip › elife_poa_e27190_Figure_4_source_data_1.xlsx]

## Sheet: Figure 4
Figure 4D																				Figure 4K
Transverse cell migration velocity (µm/min)																					Vertical			Transverse
	30min					45min					60min										Average gap size	S.E.M.		Average gap size	S.E.M.
	Pr		Cn		Pr	Pr		Cn		Pr	Pr		Cn		Pr						1.88493	0.313668		2.025	0.501803
Cell column	1	2	3	4	5	1	2	3	4	5	1	2	3	4	5						4.50477	1.16338		2.162	0.576882
	1.28	2.32	1.12	0.98	1.32	1.51	0.55	2.04	1.65	0.69	0.79	1.25	1.04	0.22	1.11						3.4978	0.569442		1.5892	0.45001
	0.63	0.64	1.57	0.16	0.84	0.78	0.57	1.91	1.72	0.22	0.93	1	1.06	0.86	0.35						3.80527	1.03293		1.8372	0.129106
	0.96	1.2	1.11	0.98	0.4	0.63	1.24	1.2	1.18	0.31	0.4	0.28	0.31	0.63	0.28						4.2482	0.698222		1.9082	0.134828
		0.71											1.56								3.78793	0.517244		2.81368	0.292215
																					3.7334	0.56339		2.73245	0.563707
																					3.49813	0.420556		2.49168	0.288141
Vertical cell migration velocity (µm/min)																					3.57987	0.778997		2.20368	0.256887
	30min						45min						60min								3.05633	0.408511		3.2895	0.539087
	Vg					An	Vg					An	Vg					An			3.69653	0.627656		2.80214	0.405155
Cell row	1	2	3	4	5	6	1	2	3	4	5	6	1	2	3	4	5	6			3.1806	0.421182		3.45073	0.710472
	1.04	0.63	0.96	0.63	1.28	1.1	0.28	0.7	0.63	0.78	1.51	0.78	0.35	0.21	0.4	0.93	0.79	0.59			2.31733	0.186584		2.12041	0.232198
	0.53	1.2	0.64	2.32	1.89	1.34	0.72	1.24	0.57	0.55	2.28	2.07	0.35	0.28	1	1.25	1.6	1.97			2.96833	0.279676		3.38295	0.707444
	0.35	0.71	0.28	1.12	1.72	1.72	0.39	1.2	1.91	2.04	2.12	1.31	0.29	0.31	1.06	1.04	0.88	1.23			2.86467	0.193526		2.78209	0.512273
	0.29	1.11	1.57	0.98	0.64	1.37	0.35	1.18	1.72	1.65	0.94		0.1	0.63	1.56	0.22	0.66				1.9234	0.210544		2.5605	0.339349
	0.53	0.98	0.16	1.32		1.47	0.08	0.31	0.22				0.35	0.28	0.86						2.0026	0.190643		2.77566	0.531501
	0.22	0.4	0.84				0.55	0.16	0.63				0.35	0.35	1.41						1.54127	0.231706		2.77691	0.495328
								1.82					0.25								1.11587	0.135054		3.28209	0.541083
																					1.08493	0.152423		1.96768	0.248822
																					1.29587	0.174763		1.3268	0.30212
																					1.17913	0.162354		1.6532	0.424592
																								1.5484	0.227122
																								1.1934	0.170787
																								1.8048	0.441996
