# Supplementary material for: Ingression-type cell migration drives vegetal endoderm internalisation in the Xenopus gastrula
Source: eLife journal article supplement (doi:10.7554/elife.27190), 2017-08-10
Supplement: supp [file elife-27190-supp-v1.zip › elife_poa_e27190_Figure_5_source_data_1.xlsx]

## Sheet: Figure 5
Figure 5E
Intercellular distance (µm)
		Embryo
	Explants	SEM	TEM
	0.454	2.48	0.785
	1.3	1.35	0.921
	1.19	0.69	1.014
	0.61	0.72	0.482
	1.04	0.56	1.988
	1.39	0.81	1.467
	1.14	1.98	0.604
	1	0.9	0.607
	1.08	1.11	0.502
	1.49	0.58	0.825
			0.784
			1.176
			0.922
			0.935
			0.554
			0.729
			0.634
			0.461
			0.972
			1.155
			0.543
			0.935
