# Supplementary material for: Ingression-type cell migration drives vegetal endoderm internalisation in the Xenopus gastrula
Source: eLife journal article supplement (doi:10.7554/elife.27190), 2017-08-10
Supplement: supp [file elife-27190-supp-v1.zip › elife_poa_e27190_Figure_6_source_data_1.xlsx]

## Sheet: Figure 6
Figure 6E						Figure 6H								Figure 6I								Figure 6J
Cell migration velocity (µm/min)																						Cell migration velocity (µm/min)
						RGE				RGD				RGE				RGD
	Cohort	Single Cells				Major axis	Minor axis	L/W Ratio		Major axis	Minor axis	L/W Ratio		Major axis	Minor axis	Congruity		Major axis	Minor axis	Congruity		RGE	RGD
	Within explants	Gelatin+FN	Gelatin	FN		1.087	0.568	1.91373		0.852	0.794	1.07305		0.708	0.708	1		1	0.958	1.04384		0.9745	0.109167
	0.0786667	6.12533	0.262333	0.131833		1.092	0.654	1.66972		1.055	0.806	1.30893		0.944	0.722	1.30748		0.625	0.75	0.833333		1.14867	0.114
	0.156667	4.14267	0.207	0.139		1.133	0.587	1.93015		0.902	0.735	1.22721		0.556	0.583	0.953688		0.5	0.812	0.615764		0.746333	0.111833
	0.219333	4.59433	0.14	0.0851667		0.97	0.631	1.53724		0.983	0.851	1.15511		0.917	0.722	1.27008		0.771	0.896	0.860491		0.406	0.241833
	0.282667	7.26833	0.178167	0.063		1.417	0.809	1.75155		1.153	0.962	1.19854		0.792	0.458	1.72926		0.583	0.75	0.777333		0.934167	0.0825
	0.314	3.64167	0.1315	0.084		0.955	0.65	1.46923		0.986	0.839	1.17521		0.764	0.528	1.44697		0.604	0.958	0.63048		1.18167	0.138167
	0.350667	3.69167	0.129833	0.0696667		1.134	0.5	2.268		0.992	0.966	1.02692		0.667	0.444	1.50225		1.083	1.083	1		0.118167	0.108333
	0.392	3.02367	0.0938333	0.0326667		0.75	0.367	2.0436		0.855	0.751	1.13848		0.639	0.528	1.21023		0.812	0.833	0.97479		1.20683	0.1235
	0.554667	3.104	0.169167	0.0526667		0.848	0.457	1.85558		0.844	0.577	1.46274		0.681	0.431	1.58005		0.938	0.792	1.18434		1.0115	0.0553333
	0.554667	1.06067	0.232333	0.156		0.965	0.734	1.31471		0.806	0.594	1.3569		0.653	0.5	1.306		0.75	0.938	0.799574		0.739	0.1285
	0.565333	3.458	0.140833	0.0335		0.754	0.568	1.32746		1.068	0.976	1.09426		0.556	0.306	1.81699		0.917	0.667	1.37481		1.04617	0.0618333
	0.625333					0.566	0.501	1.12974		1.037	0.941	1.10202		0.625	0.639	0.978091		0.938	0.917	1.0229		0.805333	0.0996667
	0.632667					0.883	0.557	1.58528		0.888	0.67	1.32537		0.653	0.431	1.51508		0.75	0.667	1.12444		0.653333	0.0741667
	0.694667					0.717	0.613	1.16966		1.122	0.94	1.19362		0.764	0.444	1.72072		0.812	0.604	1.34437		0.867333	0.0873333
	0.701333					1.135	0.884	1.28394		1.208	1.014	1.19132		1	0.653	1.53139		0.604	0.667	0.905547		1.26117	0.039
	0.723333					1.009	0.57	1.77018		0.815	0.779	1.04621		0.583	0.528	1.10417		0.729	0.812	0.897783		0.381	0.063
	0.784					1.138	0.788	1.44416		0.805	0.633	1.27172		0.625	0.444	1.40766		0.708	0.625	1.1328		0.775	0.112667
	0.784					1.11	0.795	1.39623		0.846	0.742	1.14016		0.694	0.667	1.04048		0.729	0.667	1.09295		1.27667	0.0895
	0.944667					0.732	0.56	1.30714		0.712	0.665	1.07068		0.722	0.528	1.36742		0.708	0.958	0.73904		1.38583	0.146
	0.944667					1.044	0.667	1.56522		0.744	0.703	1.05832		0.75	0.542	1.38376		0.729	0.583	1.25043		1.36	0.0681667
	1.17667					0.885	0.659	1.34294		0.936	0.605	1.54711		0.542	0.556	0.97482		0.521	0.562	0.927046
	1.19733					1.015	0.84	1.20833		1.065	0.722	1.47507		0.694	0.458	1.51528		0.667	0.708	0.94209
	1.24					0.789	0.535	1.47477		0.975	0.709	1.37518		1.139	0.875	1.30171		0.667	0.625	1.0672
	1.31467					1.213	0.889	1.36445		0.685	0.475	1.44211		0.917	0.792	1.15783		1.042	0.708	1.47175
	1.50867					0.924	0.799	1.15645		0.748	0.664	1.12651		1	0.889	1.12486		0.708	0.542	1.30627
	1.65267					1.224	0.769	1.59168		0.754	0.689	1.09434		0.75	0.639	1.17371		0.771	0.875	0.881143
	1.722					0.919	0.657	1.39878		0.882	0.706	1.24929		0.903	0.639	1.41315		0.875	0.896	0.976562
	1.81933					0.912	0.472	1.9322		0.873	0.669	1.30493		0.681	0.569	1.19684		0.583	0.583	1
	1.906					0.912	0.73	1.24932		0.682	0.525	1.29905		0.819	0.611	1.34043		1.083	1.438	0.753129
	2.036					0.791	0.567	1.39506		0.685	0.585	1.17094		0.708	0.847	0.835891		0.583	0.708	0.823446
	2.07067					0.878	0.724	1.21271		0.65	0.622	1.04502		0.639	0.639	1		0.604	0.688	0.877907
	2.12333					0.878	0.724	1.21271		0.796	0.592	1.34459		0.694	0.792	0.876263		1	0.917	1.09051
	2.28					0.976	0.73	1.33699		0.674	0.517	1.30368		0.597	0.75	0.796		0.833	0.729	1.14266
						0.871	0.669	1.30194		0.761	0.484	1.57231		0.681	0.667	1.02099		0.75	0.833	0.90036
						0.922	0.672	1.37202		0.724	0.593	1.22091		0.667	0.667	1		0.562	0.792	0.709596
						0.577	0.502	1.1494		1.023	0.643	1.59098		0.889	0.583	1.52487		0.708	0.896	0.790179
						1.1	0.668	1.64671		0.802	0.577	1.38995		0.569	0.972	0.585391		0.521	0.708	0.735876
						1.163	0.674	1.72552		0.909	0.779	1.16688		0.681	0.833	0.817527		0.5	0.5	1
						0.816	0.768	1.0625		0.467	0.347	1.34582		0.597	0.819	0.728938		0.542	0.521	1.04031
						1.177	0.866	1.35912		0.529	0.434	1.21889		0.542	0.944	0.574153		0.708	0.771	0.918288
						0.963	0.545	1.76697		0.914	0.678	1.34808		0.708	0.653	1.08423		0.625	0.646	0.967492
						1.296	0.754	1.71883		1.002	0.563	1.77975		0.708	0.653	1.08423		0.479	0.625	0.7664
						1.264	0.651	1.94163		0.822	0.574	1.43206		0.931	0.806	1.15509		0.583	0.562	1.03737
						0.765	0.703	1.08819		0.82	0.625	1.312		1.181	0.972	1.21502		0.521	0.729	0.714678
						1.14	0.727	1.56809		0.874	0.726	1.20386		0.597	0.764	0.781414		0.854	0.812	1.05172
						0.846	0.652	1.29755		0.776	0.709	1.0945		0.736	0.764	0.963351		0.833	0.833	1
						0.82	0.687	1.1936		0.688	0.657	1.04718		0.667	0.778	0.857326		0.646	0.667	0.968516
						1.154	0.711	1.62307		0.732	0.632	1.15823		0.639	0.75	0.852		0.667	0.646	1.03251
						1.16	0.593	1.95616		1.014	0.955	1.06178		0.667	0.681	0.979442		1.021	1	1.021
						0.885	0.791	1.11884		0.697	0.679	1.02651		0.569	0.403	1.41191		0.708	0.667	1.06147
						1.368	0.857	1.59627		0.556	0.548	1.0146
						0.773	0.733	1.05457
						0.857	0.589	1.45501
						1.101	0.897	1.22742
						1.28	0.699	1.83119
						0.748	0.558	1.3405
						0.701	0.468	1.49786
						1.078	0.764	1.41099
						0.679	0.506	1.3419
						0.953	0.602	1.58306
						0.993	0.584	1.70034
						0.719	0.419	1.71599
						0.976	0.754	1.29443
						1.068	0.745	1.43356
						0.837	0.472	1.77331
						0.853	0.624	1.36699
						0.967	0.707	1.36775
						0.718	0.471	1.52442
						0.69	0.444	1.55405
						0.781	0.506	1.54348
						0.681	0.541	1.25878
						0.725	0.566	1.28092
						0.96	0.681	1.40969
						0.786	0.539	1.45826
						0.827	0.632	1.30854
						0.838	0.595	1.4084
						0.875	0.58	1.50862
						0.902	0.601	1.50083
