# Supplementary material for: Ingression-type cell migration drives vegetal endoderm internalisation in the Xenopus gastrula
Source: eLife journal article supplement (doi:10.7554/elife.27190), 2017-08-10
Supplement: supp [file elife-27190-supp-v1.zip › elife_poa_e27190_Figure_7_source_data_1.xlsx]

## Sheet: Figure 7
Figure 7C								Figure 7D								Figure 7E			Figure 7F												Figure 7G												Figure 7H			Figure 7I
Control				CcadMO				Control				CcadMO				Control	cCadMO		Control												CcadMO												TST (mJ/m^2)				Control
Major axis	Minor axis	L/W Ratio		Major axis	Minor axis	L/W Ratio		Major axis	Minor axis	Congruity		Major axis	Minor axis	Congruity		16	2		Cells	1		2		3		4		5			Cells	1		2		3		4		5			Control	CcadMO		Cell	Displacement (µm)	Time (min)	Velocity
0.996	0.724	1.37569		1.943	1.597	1.21666		96	82	1.17073		1.583	2.222	0.712421		13	3		Time (min)	Total	New	Total	New	Total	New	Total	New	Total	New		Time (min)	Total	New	Total	New	Total	New	Total	New	Total	New		0.0377597	0.0240509		1	99.29	60	1.65483
0.991	0.61	1.62459		2.279	1.703	1.33823		78	52	1.5		1.917	1.944	0.986111		10	4		1	2		14		6		13		9			1	2		1		1		2		1			0.0512917	0.0419593		2	62.89	60	1.04817
1.041	0.562	1.85231		2.239	1.822	1.22887		90	76	1.18421		1.889	1.722	1.09698		10	2		2	1	-1	11	-3	9	3	16	3	10	1		2	2	0	1	0	2	1	2	0	3	2		0.0219162	0.0221506		3	182.67	60	3.0445
0.953	0.826	1.15375		2.226	1.613	1.38004		64	62	1.03226		1.861	1.694	1.09858		14	2		3	8	7	18	7	6	-3	17	1	12	2		3	3	1	1	0	2	0	2	0	4	1		0.0252758	0.026726		4	195.51	60	3.2585
1.071	0.55	1.94727		1.874	1.749	1.07147		120	104	1.15385		1.194	1.556	0.767352		12	0		4	6	-2	15	-3	10	4	19	2	17	5		4	5	2	3	2	3	1	2	0	3	-1		0.0408918	0.0216084		5	124.68	60	2.078
1.073	0.543	1.97606		2.178	1.924	1.13202		78	62	1.25806		1.194	1.361	0.877296		13	2		5	7	1	13	-2	7	-3	20	1	19	2		5	6	1	2	-1	2	-1	2	0	3	0		0.0368299	0.0218175		6	205.82	60	3.43033
1.233	0.689	1.78955		1.59	1.277	1.24511		68	64	1.0625		1.417	1.417	1		12	5		6	10	3	9	-4	8	1	17	-3	16	-3		6	7	1	3	1	2	0	1	-1	3	0		0.0437281	0.0243199		7	168.71	60	2.81183
1.114	0.695	1.60288		1.945	1.429	1.36109		84	68	1.23529		1.361	1.5	0.907333		9	1		7	4	-6	17	8	9	1	17	0	22	6		7	5	-2	4	1	3	1	1	0	3	0		0.0581055	0.0351128		8	92.57	60	1.54283
0.902	0.64	1.40938		1.408	1.185	1.18819		74	64	1.15625		1.25	1.222	1.02291			4		8	5	1	15	-2	9	0	15	-2	18	-4		8	5	0	3	-1	3	0	1	0	3	0		0.0767124	0.0538253		9	143.63	60	2.39383
0.483	0.295	1.63729		1.298	0.958	1.35491		72	52	1.38462		1.556	1.583	0.982944			1		9	7	2	10	-5	10	1	15	0	17	-1		9	6	1	4	1	3	0	2	1	3	0		0.0722151	0.0416733		10	157.6	60	2.62667
0.626	0.457	1.3698		1.243	0.891	1.39506		90	60	1.5		1.556	1.389	1.12023			2		10	4	-3	19	9	11	1	14	-1	10	-7		10	5	-1	6	2	3	0	1	-1	3	0			0.0409009		11	132.15	60	2.2025
0.735	0.482	1.5249		1.933	1.319	1.4655		68	72	0.944444		1.222	1.333	0.916729			1		11	11	7	15	-4	10	-1	15	1	16	6		11	5	0	4	-2	3	0	1	0	3	0			0.0107764		12	83.19	60	1.3865
0.626	0.539	1.16141		1.097	0.986	1.11258		98	86	1.13953		1.167	1.667	0.70006			2		12	13	2	15	0	9	-1	16	1	14	-2		12	4	-1	4	0	3	0	1	0	4	1					13	165.36	60	2.756
0.66	0.563	1.17229		1.007	0.944	1.06674		64	56	1.14286		1.917	1.611	1.18994			3		13	9	-4	15	0	9	0	13	-3	14	0		13	5	1	3	-1	3	0	1	0	4	0					14	143.81	60	2.39683
0.761	0.407	1.86978		1.351	1.262	1.07052		96	70	1.37143		1.806	1.528	1.18194			2		14	6	-3	16	1	9	0	9	-4	14	0		14	5	0	4	1	3	0	2	1	5	1					15	48.28	60	0.804667
0.791	0.369	2.14363		2.001	1.156	1.73097		80	62	1.29032		1.861	1.389	1.33981					15	6	0	17	1	10	1	11	2	15	1		15	4	-1	6	2	3	0	2	0	4	-1					16	41.67	60	0.6945
0.591	0.497	1.18913		1.783	1.441	1.23734		90	84	1.07143		1.972	1.361	1.44893					16	13	7	13	-4	10	0	15	4	15	0		16	3	-1	4	-2	3	0	1	-1	4	0					17	49.46	60	0.824333
0.714	0.396	1.80303		1.228	0.88	1.39545		80	74	1.08108		1.306	1.75	0.746286					17	9	-4	18	5	8	-2	12	-3	9	-6		17	3	0	4	0	4	1	1	0	5	1					18	120.42	60	2.007
0.925	0.635	1.45669		1.715	1.417	1.2103		96	74	1.2973		1.139	0.889	1.28121					18	8	-1	16	-2	7	-1	10	-2	14	5		18	3	0	5	1	4	0	1	0	2	-3					19	149.62	60	2.49367
0.97	0.512	1.89453		2.333	2.225	1.04854		66	66	1		2.194	2.194	1					19	11	3	18	2	4	-3	10	0	17	3		19	3	0	3	-2	4	0	2	1	2	0					20	88.8	60	1.48
0.97	0.512	1.89453		1.351	0.964	1.40145		106	66	1.60606		1.583	1.528	1.03599
1.144	0.594	1.92593		1.326	0.986	1.34483		86	68	1.26471		2.194	1.639	1.33862
1.046	0.577	1.81282		1.276	0.998	1.27856		84	70	1.2		1.528	1.306	1.16998
0.991	0.576	1.72049		1.669	1.621	1.02961		58	62	0.935484		1.083	1.056	1.02557
0.832	0.615	1.35285		2.042	1.506	1.35591		70	60	1.16667		0.944	1.306	0.722818
1.317	1.102	1.1951		2.021	1.64	1.23232
0.918	0.614	1.49511		1.007	0.737	1.36635
1.01	0.71	1.42254		1.406	1.294	1.08655
0.904	0.454	1.99119
[truncated: 3 more columns]
