# Supplementary material for: Ingression-type cell migration drives vegetal endoderm internalisation in the Xenopus gastrula
Source: eLife journal article supplement (doi:10.7554/elife.27190), 2017-08-10
Supplement: supp [file elife-27190-supp-v1.zip › elife_poa_e27190_Figure_8_source_data_1.xlsx]

## Sheet: Figure 8
Figure 8H
Vesicle size (µm)
S10	S10.5	S11	S12
0.117	0.128	0.247	0.07
0.076	1.101	0.195	0.065
0.138	0.17	0.576	0.048
0.12	1.281	0.69	0.078
0.255	2.706	0.116	0.119
0.316	0.802	0.157	0.136
0.122	0.955	0.137	0.184
0.16	1.689	0.092	0.188
0.099	0.221	0.26	0.141
0.25	0.237	0.194	0.163
0.165	0.17	0.384	0.205
0.109	0.509	0.104	0.447
0.182	1.007	0.23	0.145
0.135	0.537	0.156	0.148
0.149	1.774	0.221	0.3
0.151	0.922	0.247	0.276
0.092	0.208	0.118	0.601
0.107	0.356	0.124	0.084
0.079	0.307	0.11	0.247
0.138	0.845	0.147	0.465
0.127	0.144	0.093	0.466
0.084	0.124	0.075	0.278
0.126	0.124	0.147	0.181
0.086	0.112	0.158	0.266
0.118	0.22	0.093	0.276
0.081	0.124	0.131	0.696
0.093	0.204	0.104	0.451
0.168	0.112	0.069	0.511
0.155	0.211	0.135	0.737
0.137	0.174	0.098	0.535
0.202	0.215	0.136	0.316
0.262	0.313	0.171	0.293
0.158	0.197	0.168	0.46
0.178	0.269	0.086	0.344
0.194	0.963	0.316	0.385
0.157	0.38	0.236	0.406
0.166	0.323	0.232	0.211
0.2	1.235	0.246	0.242
0.464	0.657	0.34	0.215
0.116	0.77	0.182	0.202
0.093	0.379	0.274	0.503
0.077	0.189	0.162	0.416
0.19	0.307	0.161	0.322
0.401	0.261	0.49	0.499
0.19	0.141	0.149	0.245
0.231	0.377	0.172	0.118
0.215	0.207	0.717	0.167
0.211	0.217	0.612	0.289
0.104	0.185	0.434	0.654
0.159	0.189	0.482	0.274
0.091	0.141	0.319	0.177
0.199	0.155	0.195	0.153
0.092	0.156	0.963	0.194
0.304	0.513	0.274	0.221
0.203	0.451	0.215	0.309
0.256	1.341	0.2	0.191
0.267	1.388	0.343	0.153
0.211	0.574	0.29	0.2
0.328	0.647	0.313	0.153
0.189	0.614	0.79	1.146
0.193	0.972	0.539	4.19
0.16	1.484	0.195	1.21
0.092	0.802	0.367	1.08
0.172	0.26	0.211	3.58
0.123	0.443	0.245	2.28
0.171	1.111	0.338	0.93
0.411	0.37	0.41	0.99
0.154	0.438	0.692	1.11
0.086	0.377	1.573	0.56
0.187	0.294	0.611	0.27
0.229	0.367	0.387	0.29
0.143	2.783	0.438	0.63
0.262	3.442	0.268	0.87
0.247	2.471	0.738	0.83
0.453	0.757	0.309	0.6
0.15	0.911	0.168	0.55
0.261	0.543	0.718	0.77
0.135	0.494	0.86	0.56
0.228	0.57	2.875	0.69
0.339	0.997	0.174	0.61
0.192	0.952	0.61	0.4
0.211	2.055	0.46	0.54
0.169	1.26	0.44	0.3
0.265	1.742	0.38	0.5
0.212	1.08	0.31	0.23
0.128	2.817	0.93	0.29
0.201	3.365	0.32	0.33
0.16	2.224	0.67	0.91
0.282	3.055	0.45	0.76
0.23	2.128	0.59	0.49
0.165	1.494	0.56	0.44
0.162	1.895	0.37	0.42
0.126	1.168	0.41	0.25
0.208	1.055	0.68
0.279	1.427	0.35
0.141	1.793	0.48
0.314	2.155	0.3
0.276	2.412	0.29
0.2	1.457	0.37
0.179	3.071	0.17
0.176		0.22
0.195		0.21
0.165		0.13
0.128		0.11
0.209		0.13
0.119		0.73
0.162		0.28
0.174		0.3
0.115		0.21
0.1		0.25
0.156		0.14
0.115		0.26
0.139		0.61
0.2		0.47
0.137		0.29
0.202		0.21
0.155		0.19
0.228		0.47
0.179		0.67
0.182		0.8
0.584		1.05
0.253		0.24
0.569		0.26
		0.62
		0.83
		0.7
		0.71
		0.77
		0.7
		0.41
		1.11
		0.84
		0.83
		1.58
		0.94
