# Supplementary material for: Ingression-type cell migration drives vegetal endoderm internalisation in the Xenopus gastrula
Source: eLife journal article supplement (doi:10.7554/elife.27190), 2017-08-10
Supplement: supp [file elife-27190-supp-v1.zip › elife_poa_e27190_Figure_9_figure_supplement_1.pdf]

Figure 9 – Supplement 1

|                   |                                                                                   |                                                                                   |                                                                                    |
|-------------------|-----------------------------------------------------------------------------------|-----------------------------------------------------------------------------------|------------------------------------------------------------------------------------|
| Embryo Phenotypes | 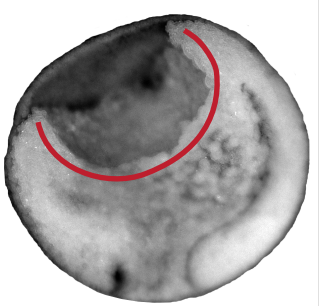 | 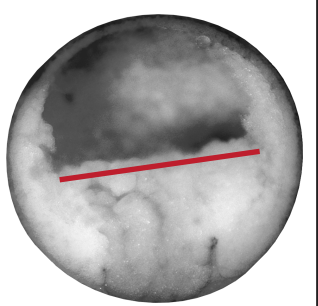 | 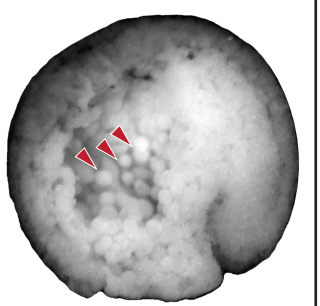 |
|                   | Control<br>(wildtype)                                                             | eB1MO<br>(knockdown)                                                              | eB1FL<br>(overexpression)                                                          |
|                   | Control                                                                           | eB1MO                                                                             | eB1FL                                                                              |
