# Supplementary material for: Ingression-type cell migration drives vegetal endoderm internalisation in the Xenopus gastrula
Source: eLife journal article supplement (doi:10.7554/elife.27190), 2017-08-10
Supplement: supp [file elife-27190-supp-v1.zip › elife_poa_e27190_Figure_9_source_data_1.xlsx]

## Sheet: Figure 9
Figure 9C				Figure 9E				Figure 9G
Fluorescence intensity (a.u.)								Width (µm)
Membrane domains				Control	eB1MO	eB1FL		Control											eB1MO
Lead/Lat.	Trailing			9	2	41		Time (min)	1	2	3	4	5	6	7	8	9		Time (min)	1	2	3	4	5	6	7	8	9	10
1864	2697			22	1	34		0	32.44	26.08	29.93	21.76	22.89	19.71	21.53	15.64	19.7		0	35.4	32.57	21.09	28.59	29.67	20.8	27.59	21.79	23.42	29.24
1865	2430			19	7	29		5	26.45	20.42	21.28	16.73	16.37	19.07	15.41	9.12	14.51		5	37.66	28.66	22.25	22.6	27.91	18.49	24.03	21.93	24.74	33.4
1598	2397			12	8	48		10	22.14	14.77	22.94	12.37	17.57	13.46	11.86	10.13	11.22		10	37.37	30.05	19.26	23.82	26.18	21.27	26.27	20.32	25.33	31.95
1598	3196			15	4	57		15	18.61	15.06	14.9	10.03	11.39	10.26	14.75	7.17	9.84		15	37.98	29.67	20.23	24.93	28.24	18.49	27.66	21.88	24.33	29.74
1332	1864			9	8	41		20	13.8	9.84	13.76	6.35	12.04	9.68	12.04	7.53	7.93		20	37.98	30.42	21.17	27.32	28.54	19.58	26.55	20.08	22.71	30.41
1066	2397			24	8	38		25	10.98	8.01	14.7	7.48	7.72	7.93	12.53	6.8	8.85		25	32.24	29.89	23.64	20.38	26.02	20.28	21.31	22.66	24.7	31
2131	2697			20	4	28		30	8.85	7.04	13.76	4.3	7.06	6.27	8.75	5.22	5.72		30	31.74	26.74	23.21	26	28.08	18.93	26.16	21.28	23.31	30.61
1864	2664			21	1	40		35	6.76	4.18	11.07	2.87	2.95	6.8	6.59	4.05	4.99		35	29.25	23	19.73	25.2	26.16	19.79	27.06	23.33	20.5	32.49
1332	2930			32	1	39		40	9.13	4.67	9.12	3.96	3.4	6.82	5.17	2.09	3.96		40	25.16	24.85	19.73	22.98	28.95	19.58	26.57	22.85	22.91	29.4
1865	2664			22		40		45	7.67	2.53	7.04	3.69	3.24	4.53	3.08	1.13	4.3		45	26.47	25.97	17.68	21.54	25.03	21.36	26.22	23.9	22.09	27.89
1332	1865			33
1598	2131			15
1332	2397			29
1865	2164			9
1332	2131			25
1066	1066			34
1066	2930			38
1598	2397
1598	3462
1598	2164
1598	2131
1598	2397
1864	2397
1598	2430
2131	1865
1598	1332
1332	3995
1332	2664
1598	2397
1332	2397
1332	2397
1332	2131
1598	2131
1598	2131
1598	2397
