# Supplementary figures and images for: Ingression-type cell migration drives vegetal endoderm internalisation in the Xenopus gastrula
Source: eLife journal article supplement (doi:10.7554/elife.27190), 2017-08-10

Figure 9 – Supplement 2

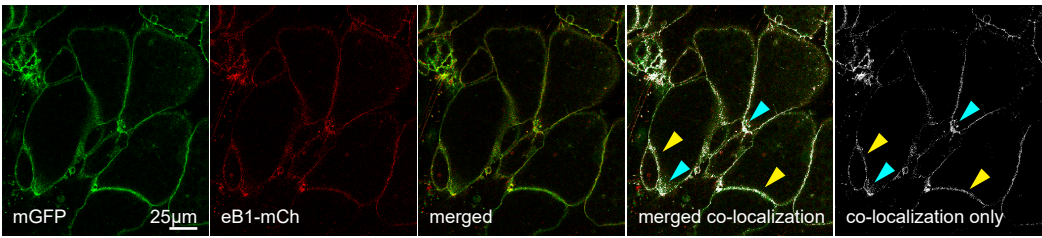

Supplement: supp [file elife-27190-supp-v1.zip › elife_poa_e27190_Figure_9_figure_supplement_2.pdf]

Figure 2 – Supplement 1

A

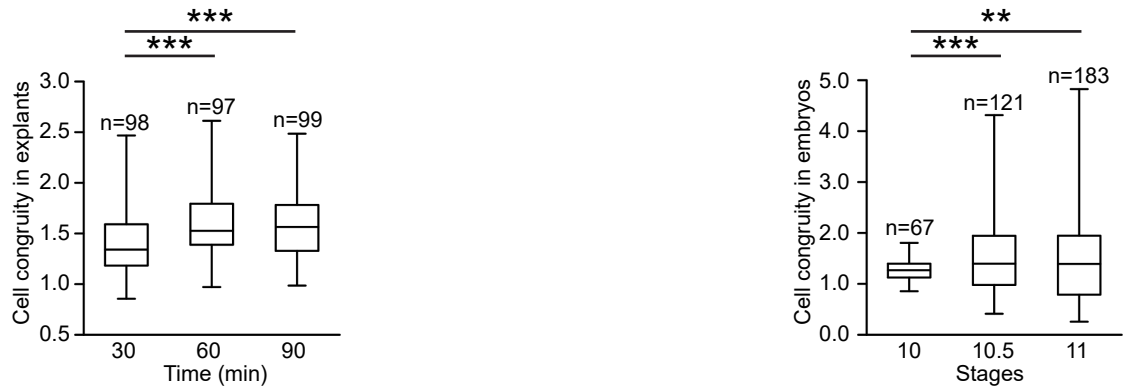

B

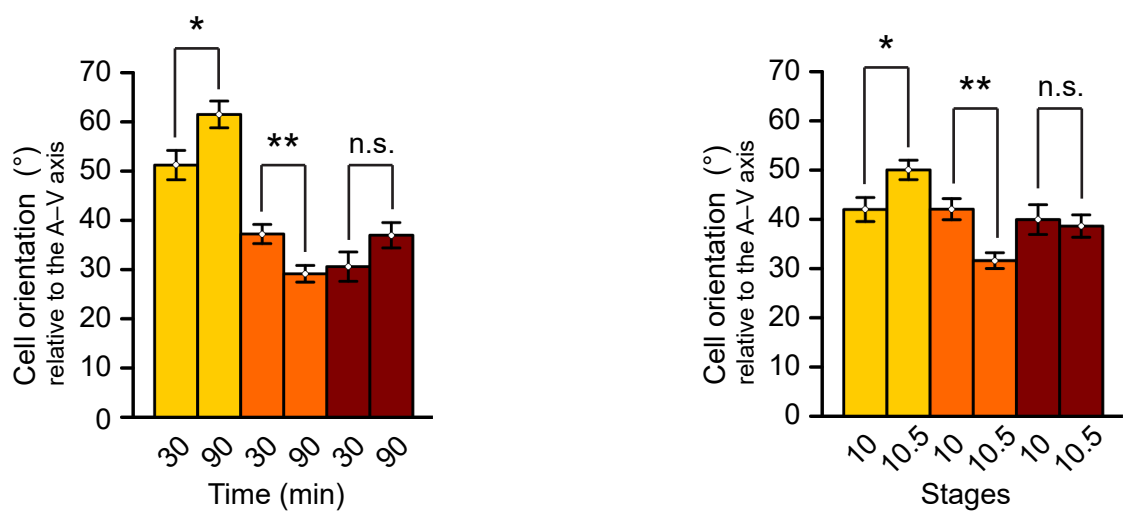

Supplement: supp [file elife-27190-supp-v1.zip › elife_poa_e27190_Figure_2_figure_supplement_1.pdf]

Figure 4 – Supplement 1

A

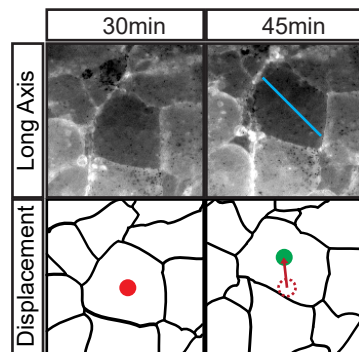

B

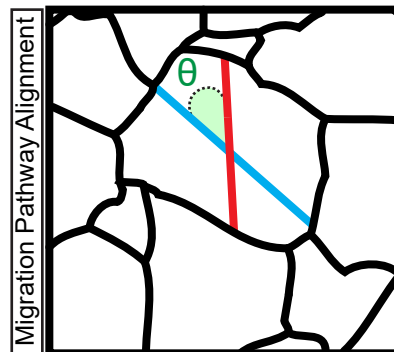

C

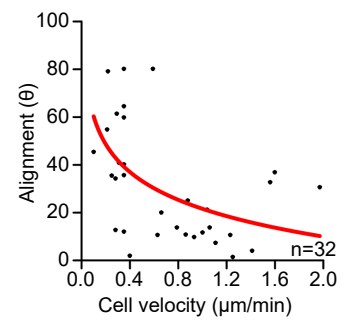

Supplement: supp [file elife-27190-supp-v1.zip › elife_poa_e27190_Figure_4_figure_supplement_1.pdf]

Figure 6 – Supplement 1

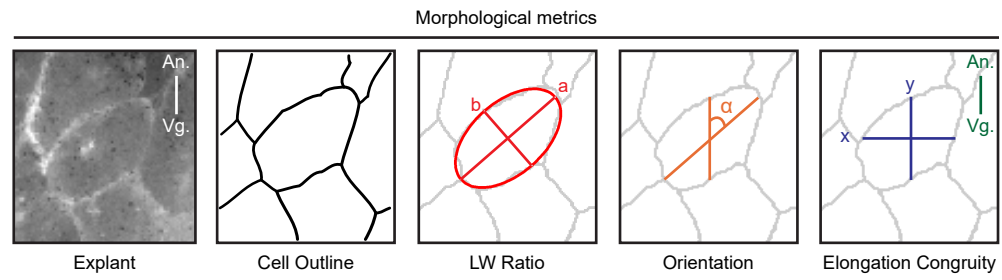

Supplement: supp [file elife-27190-supp-v1.zip › elife_poa_e27190_Figure_6_figure_supplement_1.pdf]

Figure 8 – Supplement 1

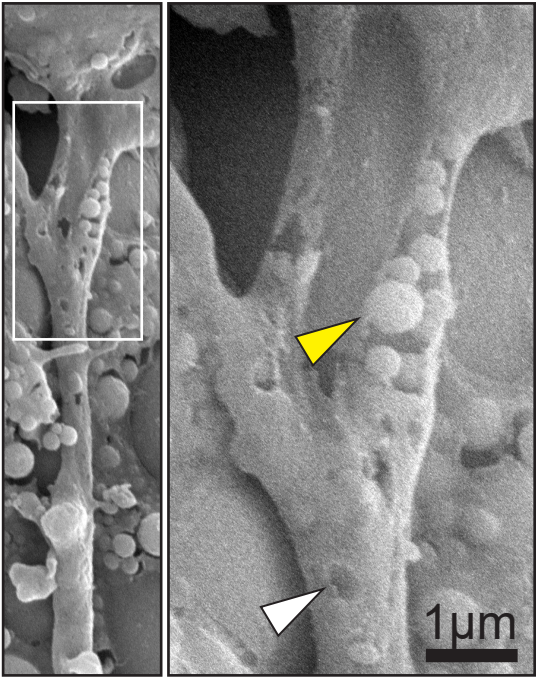

Supplement: supp [file elife-27190-supp-v1.zip › elife_poa_e27190_Figure_8_figure_supplement_1.pdf]

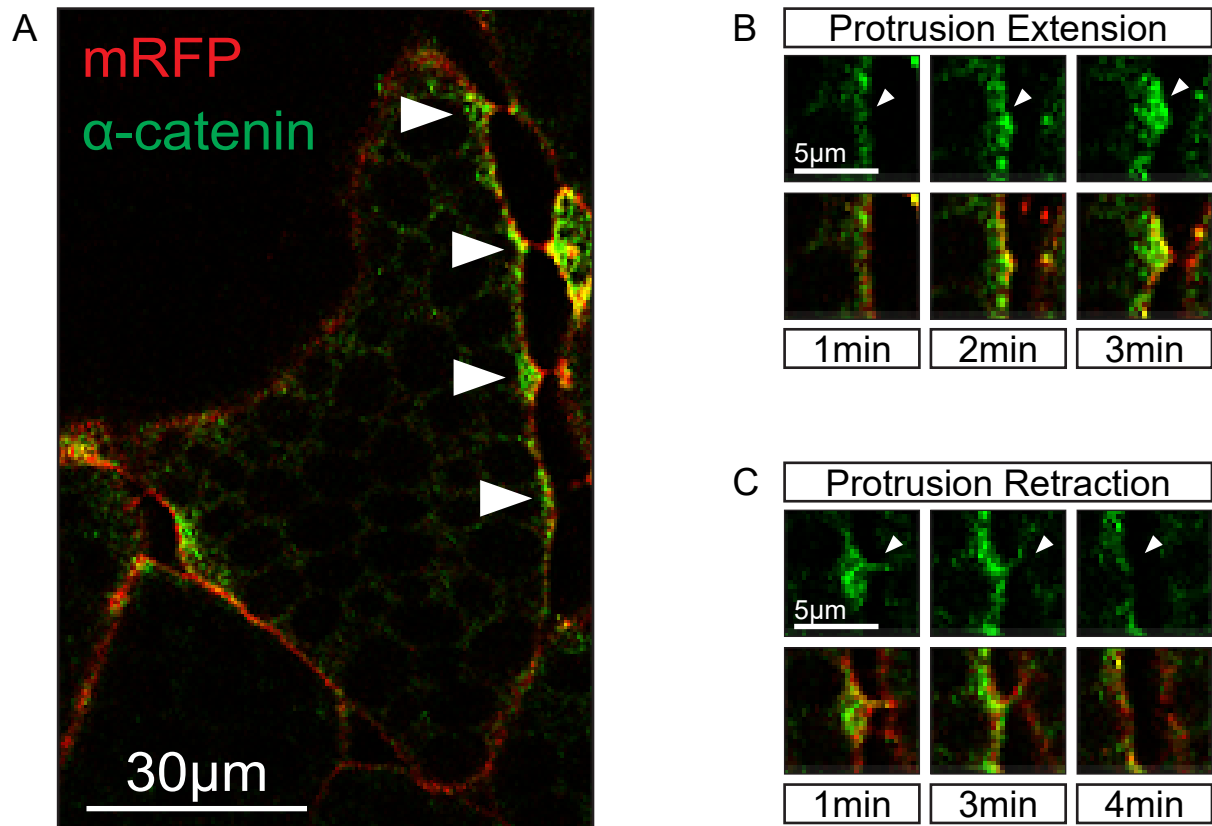

Supplement: supp [file elife-27190-supp-v1.zip › elife_poa_e27190_Figure_7_figure_supplement_1.pdf]
